1 Variation in diet and microbial exposure shape the performance of the Asian tiger  
2 mosquito, *Aedes albopictus*

3

4 Vincent Raquin,<sup>a#\*</sup> Edwige Martin,<sup>a</sup> Guillaume Minard,<sup>a</sup> Claire Valiente Moro<sup>a#</sup>

5

6 <sup>a</sup>Univ Lyon, Université Claude Bernard Lyon 1, CNRS, INRAE, VetAgro Sup, UMR  
7 Ecologie Microbienne, F-69622 Villeurbanne, France.

8

9 Running Title: Diet and bacteria shape mosquito performance

10

11 #Address correspondence to Claire Valiente Moro, [claire.valiente-moro@univ-lyon1.fr](mailto:claire.valiente-moro@univ-lyon1.fr) and  
12 Vincent Raquin, [vincent.raquin@ephe.psl.eu](mailto:vincent.raquin@ephe.psl.eu)

13 \*Present address: Université de Lyon, Université Claude Bernard Lyon1, INRAE, EPHE,  
14 PSL Research University, IVPC, Viral Infections and Comparative Pathology, UMR754,  
15 F69007 Lyon, France.

16 **ABSTRACT**

17 Along their life cycle, mosquitoes colonize different ecological niches with various  
18 microorganisms and diet sources that likely modulate their performance (*i.e.* a set of  
19 mosquito fitness-related traits). However, which ecological parameters and how their  
20 variations modulate mosquito performance is not completely understood. In this study, we  
21 used *Ae. albopictus* surface-sterilized eggs re-associated or not to conventional bacterial  
22 microbiota upon a range of diet concentrations and addressed the impact of microbial  
23 inoculum and diet concentration variation on several mosquito performance traits. Results  
24 showed that mosquito juvenile survival depends on the interaction between bacterial  
25 inoculum load and diet concentration in the breeding water. Exposure to bacteria in rearing  
26 water shorten larval development time although it impacted larvae survival in an inoculum  
27 and diet concentration-dependent manner. Bacterial composition of larval rearing water  
28 was mainly structured by the bacterial inoculum concentration, with some Operational  
29 Taxonomic Units abundances correlating with larval traits. *Ae. albopictus* survival,  
30 development and bacterial community patterns upon gradients of diet and bacterial  
31 inoculum illustrated the complex impact of diet-microbiota interaction on mosquito  
32 performance. These findings argue the importance of deciphering host-microbe-  
33 environment interactions and open promising perspectives to improve *Ae. albopictus*  
34 control measures in the field.

35

36 **IMPORTANCE**

37 Microbiota is increasingly recognized as a driving force of metazoan biology, impacting  
38 diverse traits including nutrition, behaviour or reproduction. The microbial impact on host  
39 nutrition is among the most studied host-microbe interactions although it remains poorly  
40 understood in arthropod vectors like mosquitoes. Here, we manipulated mosquito  
41 microbiota using gnotobiology to decipher the impact of bacteria and diet on the Asian

42 tiger mosquito, *Ae. albopictus*. These results are key to understand the link between diet  
43 and bacteria concentration on juvenile mosquitoes as well as carry-over effects in adults.  
44 They unveil some specific aspects of mosquito-bacteria interactions while opening  
45 interesting avenues for vector management of this vector of arboviruses.

46

47 **KEYWORDS:** Mosquito ecology ; symbiosis ; microbiota ; diet ; *Aedes albopictus*

48

## 49 INTRODUCTION

50 From mammals to insects, host-microbiota interactions drive host nutrition,  
51 behavior, reproduction or development thereby impacting host fitness (1, 2). However, the  
52 ecological determinants governing these symbiotic interactions remain unknown in many  
53 systems. During nutritional symbioses, microbial symbionts benefit to host by serving as  
54 nutrient source, detoxifying diet, participating in nutrient digestion/intake or supplementing  
55 diet with essential molecules (2, 3). Converging evidences show that diet is a driving force  
56 of symbiosis, for instance by selecting for diet-adapted microbial communities (4, 5).  
57 Advances in the field of symbiotic interactions benefited from the development of  
58 gnotobiology (*i.e.* study of hosts with a controlled microbiota) as well as holidic diets (*i.e.*  
59 synthetic nutrient source made of pure chemical components). In insects, individuals are  
60 deprived from environmentally-acquired microorganisms by surface sterilization of eggs  
61 that are put to hatch under sterile environment (6). Individuals can then be re-associated  
62 to selected microorganisms to interrogate microbial influence on host traits, under varying  
63 (a)biotic conditions such as diet. However, holidic diets and gnotobiotic models are  
64 unevenly available among host species (8) although attempts are made to develop  
65 gnotobiology and holidic diets in mosquitoes (9, 10).

66 Compelling evidences from the fruit fly *Drosophila melanogaster* obtained by  
67 comparing axenic with gnotobiotic individuals support that bacteria are not only a source of  
68 nutrients but establish a diet-dependent nutritional symbiosis to provide their host with  
69 essential factors when raised on scarce diets (11–13). However, in mosquitoes the impact  
70 of the microbiota on mosquito performance under the influence of the diet in a still poorly  
71 understood way. Mosquitoes (*Diptera: Culicidae*) are holometabolous insects with four  
72 distinct life stages (egg, larvae, pupae and adult). Larval and pupal stages develop in  
73 aquatic breeding sites before winged adults emerge. The breeding site provides larvae  
74 with nutrients to complete their development (14–16) and shapes their microbiota (17–19).

75 Diet quantity and composition impact mosquito larval growth, development time and  
76 survival (20–25) as well as adult immunity, vector competence and fitness (26–30). Natural  
77 larval water habitats contain variable resource inputs that stimulate microbial growth, with  
78 the decomposition of detritus by microorganisms releasing nutrients uptake by larvae (31–  
79 33). In turn, microbiota also deeply impacts mosquito biology, from larval to adult stage  
80 (18). Supplementation of sterile larval rearing water with living bacteria seemed mandatory  
81 to reach adult stage (34, 35). However, optimal diet and rearing conditions can lead to  
82 complete larval development in absence of environmental microorganisms, as  
83 demonstrated in a proof-of-concept study in *Ae. aegypti* (36). Similarly to what was  
84 reported in *D. melanogaster* (37, 38) axenic mosquito larvae present major physiological  
85 changes including larval developmental delay, reduced adult size or extended adult life  
86 span that correlate with specific transcriptomic profiles compare to conventional larvae (36,  
87 39, 40). More recently, study of axenic *Ae. aegypti* showed that bacteria in rearing water  
88 mediate larval nutrient sensing and growth activation by provisioning larvae with essential  
89 vitamins (41, 42). In *Ae. aegypti*, bacteria-mediated growth-promoting effect on larvae  
90 depends on both the bacterial strain and diet type (rat chow or fish food) (43). Microbial  
91 supplementation of water as unique nutrient source is not as efficient as synthetic rich diet  
92 in promoting larval survival and developmental rate in conventionally reared (*i.e.* non  
93 axenic) individuals, with major variations in larval performance being observed according  
94 to the microbial strains used (44). This underlines that an interaction between microbiota  
95 and diet during larval stage impacts performance in *Ae. aegypti* larvae, with potential  
96 carry-over effects on adult traits (26, 45). Recent data in *Ae. aegypti* suggest that diet x  
97 microbiota interaction occurs as diet concentration impacts bacterial abundance and  
98 composition in rearing water and larvae (46). However, additional data are needed to  
99 assess if diet and microbiota have similar effects on the biology of other mosquito species,  
100 and if and how diet x microbiota interaction shapes mosquito performance.

101           The Asian tiger mosquito *Aedes albopictus* is an important vector of human  
102 pathogens including dengue virus, chikungunya virus or Zika virus (47, 48). This mosquito  
103 species thrives notably in urban and suburban environments where females lay eggs in a  
104 broad range of breeding sites (51). Field-collected specimens harbor a core bacterial  
105 microbiota although variations in bacterial diversity and community structure are observed  
106 according to geographic origin, developmental stage or sex (52). Bacteria impact host  
107 traits in *Ae. albopictus* including oviposition site selection (53), sugar feeding (54) or larval  
108 development (55). *Ae. albopictus* juvenile development also depends on diet as larvae  
109 present a developmental delay below a given diet concentration that microbiota, including  
110 the native intracellular bacterium *Wolbachia* cannot counterbalance (56). Together, it  
111 suggests that microbiota and diet impact *Ae. albopictus* performance. But to the best of  
112 our knowledge, no work generated axenic *Ae. albopictus* nor study the concomitant impact  
113 of diet and microbiota concentration on mosquito performance. *Ae. albopictus* larvae were  
114 successfully deprived from environmental microorganisms, with the exception of  
115 intracellular ones such as *Wolbachia*, while allowing larval development up to the adult  
116 stage. In order to disentangle the relative and combined importance of both microbiota and  
117 diet on mosquito traits, the performance of gnotobiotic *Ae. albopictus* was investigated  
118 along a gradient of nutrient concentrations. Water microbial community composition and  
119 relative abundance were also determined across diet and inoculum conditions.

## 120 RESULTS

121

122 **Altered microbiota larvae exhibit a diet-dependent juvenile developmental**  
123 **pattern compared to conventional siblings upon constant bacterial inoculum**  
124 **concentration.** *Ae. albopictus* larvae naturally hosting the intracellular bacterium  
125 *Wolbachia* but deprived from environmental microorganisms were generated by egg  
126 surface sterilization (FIG S1), hereafter referred as altered microbiota (AM) larvae. A very  
127 low (about 8,600 fold less as estimated by 16S qPCR) residual amount of bacterial DNA in  
128 AM rearing water was still detected compare to conventional (CONV) water after egg  
129 sterilization (FIG S3). It was composed of bacterial OTUs either poorly abundant  
130 (*Aeromonas*, *Dysgonomonas*, *Pseudomonas*) and/or only found in highly diluted inoculum  
131 condition (*Bacteroides*, *Stenotrophomonas*) of CONV water samples (FIG S3 and FIG 4).  
132 Of note, AM larvae were stalled at larval stage only reached adult stage when incubated in  
133 darkness (data not shown) recapitulating axenic mosquito larvae development pattern  
134 from previous studies (36, 41).

135 The impact of diet concentration in rearing water on larval development was  
136 estimated using AM larvae or siblings re-associated upon hatching with a conventional  
137 microbial inoculum (CONV) composed of 5 to 6 major bacterial species (FIG S2). AM and  
138 CONV larvae were exposed to a gradient of diet from 0.1% to 20% concentration (FIG S4).  
139 Diet concentration modulates larvae development depending on the microbial status (Wald  
140  $\chi^2$ ,  $P_{\text{diet} \times \text{microbial status}} = 3.97e^{-05}$ ). Overall, CONV larvae developed from 12% to 0.5% diet  
141 concentration whereas AM larvae developed from 20% to 5% although larval viability  
142 reached higher values in AM compare to CONV (FIG S4). Indeed, when exposed to a  
143 single, low dilution ( $10^{-3}$ ) of inoculum, the proportion of CONV larvae that reached pupal  
144 stage remained below 25% regardless of diet concentration. In addition, an increase in

145 water turbidity was noticed the day after inoculation with larval death occurring prior fourth  
146 instar.

147 To disentangle the impact of microbiota and diet concentration on mosquito larvae  
148 development, a set of three experiments was conducted in which larvae were exposed to  
149 a single dose of bacterial inoculum, but more diluted ( $10^{-6}$ ) to limit larval mortality while  
150 randomizing microbiota variation by loading a different bacterial inoculum in each  
151 experiment. Four diet concentrations spanning the viable range for AM and CONV larvae  
152 (2, 5, 10 and 12%) were tested. Results showed that larval development differs according  
153 to experiments (FIG 1), maybe due to variations in egg batch or composition of microbial  
154 inoculum (FIG S2). When controlling for random experiment effect, larvae-to-pupae  
155 viability depended on the interaction between microbial status and diet concentration  
156 (Wald  $\chi^2$ ,  $P_{\text{diet} \times \text{microbial status}} < 2.2e^{-16}$ ) (FIG 1A). AM larvae survival from 5 to 12% diet  
157 concentration was similar but lower than at 2% whereas CONV larvae viability at 2 and 5%  
158 diet concentration was similar but higher than at 10 and 12% (FIG 1A). Unlike larvae,  
159 pupae-to-adult viability was not impacted by these two variables (Wald  $\chi^2$ ,  $P_{\text{diet}} = 0.16$ ,  
160  $P_{\text{microbial status}} = 0.31$ ,  $P_{\text{diet} \times \text{microbial status}} = 0.51$ ) (FIG 1B). Larval viability was higher in AM  
161 compared to CONV except at the lowest diet concentration of 2% (FIG 1A). Among the  
162 larvae that reached pupal stage, we measured the time (in days) needed to reach 50% of  
163 the final number of pupae ( $\text{Day}_{50}$ ) as a proxy of development time. As observed for larvae-  
164 to-pupae viability, mosquito juvenile development time depended on the interaction  
165 between microbial status and diet concentration (Anova,  $P_{\text{diet} \times \text{microbial status}} < 2.2e^{-16}$ ) (FIG  
166 1C). Overall, CONV larvae always developed faster (about 7 days) than AM counterparts.  
167 The  $\text{Day}_{50}$  of CONV larvae at 2, 5 and 10% diet concentrations were similar but smaller  
168 than at 12%, whereas the  $\text{Day}_{50}$  of AM larvae at 2% diet concentration was higher than at  
169 5%, which in turn was higher than at 10 and 12% (FIG 1C).



170 No significant difference was observed in the proportion of adults from each sex  
171 according to microbial status, diet concentration or their interaction (Wald  $\chi^2$ ,  $P_{\text{diet}} = 0.72$ ,  
172  $P_{\text{microbial status}} = 0.50$ ,  $P_{\text{diet} \times \text{microbial status}} = 0.067$ ) (FIG 2A). Adult wing length was significantly  
173 impacted by the interaction between microbial status and diet concentration (Anova,  $P_{\text{diet} \times}$   
174  $\text{microbial status} = 0.009$ ) (FIG 2B). CONV females presented larger wings compare to males,  
175 and within each sex, wing length was not different according to diet concentration. In AM  
176 conditions, females displayed higher wing length compared to males except at 2% diet  
177 concentration, with all males presenting similar wing length regardless of diet  
178 concentration. Within AM females, a similar wing length was measured at 10 and 12%.  
179 However, AM females were larger at 12%, compared to 5 and 2% diet concentrations.

180

181 **Bacterial load and diet concentration in larval rearing water are strong**  
182 **predictors of *Ae. albopictus* juvenile performance.** We showed that at constant initial  
183 load, bacteria promote larval performance depending on diet concentration. In nature,  
184 microbial load and diet concentration are likely to vary in larval breeding sites. Therefore,  
185 we asked if and how concurrent variation in bacterial inoculum and diet concentration  
186 could shape mosquito juvenile performance. Within a single experiment, CONV larvae  
187 were exposed to three different dilutions of inoculum ( $10^{-4}$ ,  $10^{-6}$  and  $10^{-8}$ ) and three diet  
188 concentrations (1, 5 and 12%) prior to measure larval viability, development time and  
189 microbiota composition. Concentrations of inoculum and diet were chosen according to  
190 previous conditions showing the most contrasted effects on larval performance (FIG 1).  
191 Three independent batches of inoculum (B1, B2 and B3) were used. Analysis of the  
192 bacterial community variance of the water of each batch showed differences in bacterial  
193 composition (FIG S2). When controlling for inoculum batch variation, results showed that  
194 larval viability is impacted by the interaction between inoculum and diet concentration  
195 (Wald  $\chi^2$ ,  $P_{\text{diet} \times \text{inoculum}} = 6.86e^{-7}$ ) (FIG 3A). At  $10^{-4}$  inoculum dilution, larval viability is the

196 lowest overall, with 1 and 5% diet concentrations presenting similar but higher viability  
197 than 12%. Larval viability is higher at  $10^{-6}$  compared to  $10^{-4}$  inoculum dilution, except for  
198 the 12% diet concentration. At  $10^{-6}$  inoculum dilution, no difference in larval viability was  
199 found according to diet concentration although the pattern shows a decrease in larval  
200 viability as diet concentration increased, as previously observed (FIG 3A and 1A). At  $10^{-8}$   
201 inoculum dilution, larval viability pattern shows an opposite trend compared to  $10^{-6}$ , with  
202 larval viability increasing with diet concentration. Viability at 1% and 5% diet concentration  
203 is similar but lower compare to 12% that displays a significantly higher viability compare to  
204 all the conditions tested (FIG 3A). The median larval development time depends on both  
205 microbial inoculum and diet concentration although the interaction was not significant  
206 (Wald  $\chi^2$  on data transformed by  $1/x^2$  function,  $P_{\text{diet}} = 0.018$ ,  $P_{\text{inoculum}} = 1.10e^{-14}$ ,  $P_{\text{diet} \times}$   
207  $\text{inoculum}} = 0.11$ ). Day<sub>50</sub> increased upon  $10^{-4}$  and  $10^{-8}$  inoculum dilution compared to  $10^{-6}$ ,  
208 although it varied with the diet concentration. The shortest Day<sub>50</sub> was measured at  $10^{-6}$   
209 inoculum and 5% diet concentration, being significantly lower compared to  $10^{-4}$  / 12% and  
210  $10^{-4}$  / 1% conditions as well as all  $10^{-8}$  diet concentrations (FIG 3B). Taken together, our  
211 results indicate that *Ae. albopictus* larval performance cannot be fully understood without  
212 considering the combined impact of diet and bacterial inoculum, that have carry-over  
213 effects on adult wing length. While specific larvae survival patterns were observed upon  
214 diet x microbiota interaction, the development time seems less constraint by this  
215 interaction with a trend for bacteria-associated to develop faster overall especially upon  
216 higher microbial inoculum although some diet concentration specific variations still  
217 remained.

218

219 **Initial bacterial inoculum and diet concentration shape aquatic habitat**  
220 **microbiota composition with bacterial taxa significantly correlated with *Ae.***  
221 ***albopictus* performance.** Eleven bacterial OTUs were identified at the genus level (with

222 >5% relative abundance) within the rearing water that served as microbial inoculum for  
223 CONV larvae (FIG S2). Six out of these 11 OTUs (*Brevundimonas*, *Delftia*,  
224 *Flavobacteriaceae*, *Pseudomonas*, *Sphingobacteriaceae* and *Sphingobacterium*) were  
225 found five days later in the water of CONV larvae (FIG 4A). Visualisations of the relative  
226 abundances of the 26 most predominant genera suggested a strong structuration of  
227 bacterial microbiota according to initial inoculum concentration, and to a lesser extent, diet  
228 concentration (FIG 4A). Beta diversity (microbial diversity between samples) of water  
229 samples was represented using non-metric multidimensional scaling (NMDS) with Bray  
230 Curtis dissimilarity as the distance metric (FIG 4B-C). When assessing the effect of diet  
231 concentration (1, 5 or 12%), inoculum dilution ( $10^{-4}$ ,  $10^{-6}$  or  $10^{-8}$ ) and batch of inoculum  
232 (B1, B2, B3), the triple interaction was significant (PERMANOVA,  $P_{\text{Inoculum} \times \text{diet} \times \text{batch}} =$   
233 0.005,  $R^2 = 0.0047$ ) (FIG 4B). When trying to disentangle the effect of individual factors on  
234 bacterial structure, inoculum dilution had a strong impact when plotted against diet  
235 concentration (FIG 4C). These data indicate that complex interactions occur between diet  
236 concentration and that the initial composition and abundance of bacterial inoculum shape  
237 community structure in larval rearing water. Overall, the bacterial microbiota is  
238 homogenous upon when inoculating a high bacterial load whereas a lower amount of  
239 inoculum triggers a shift toward a more variable bacterial community in rearing water.  
240 Correlation matrix between OTUs abundance (in sequencing reads) and larval traits,  
241 including development time (median Day<sub>50</sub>), inoculum dilution ( $10^{-4}$ ,  $10^{-6}$  and  $10^{-8}$ ), diet  
242 concentration (1, 5 and 12%) or larval viability (in %) was performed (FIG 4D). Twenty-two  
243 OTUs displayed a significant correlation (Spearman,  $P < 0.05$ ) with a correlation coefficient  
244 below -0.4 or above 0.4 that we used as threshold. Only one OTU, assigned to  
245 *Bacteroides* genera, correlated with Day<sub>50</sub> (FIG 4D). Most of the OTUs correlating in  
246 relative abundance with one or more larval traits had a low relative abundance with the  
247 exception of *Sphingobacterium* (relative abundance correlated with larval viability),

248 *Chryseobacterium* (abundance correlated with both larval viability and inoculum dilution)  
249 and *Bosea* (abundance correlated with larval viability and diet concentration) (FIG 4A&D).  
250 Details of significant correlation patterns between OTUs relative abundance and larval  
251 traits, diet and inoculum concentration for OTUs with the highest relative abundance are  
252 shown in FIG S5.

253

## 254 **DISCUSSION**

255

256 Our study demonstrated that microbiota and diet in aquatic larval habitat drive  
257 ecological performance of *Ae. albopictus* larvae with carry-over effects on adult  
258 mosquitoes. This study is the first, to the best of our knowledge, to address *Ae. albopictus*  
259 development using larvae deprived from external microorganisms (AM) and siblings re-  
260 associated with conventional bacteria (CONV). AM larvae of *Ae. albopictus* developed up  
261 to the adult stage, as observed in axenic from *Aedes aegypti* (36) or *Drosophila*  
262 *melanogaster* (11). If the presence of living but non-cultivable bacteria cannot be ruled out,  
263 AM larvae delayed development time and shorter wing length recapitulated developmental  
264 phenotypes of axenic *Ae. aegypti* (36). More broadly, these results resonate with studies in  
265 axenic flies and mice reinforcing the role of microbiota as a promoter of juvenile  
266 development in metazoan (57, 58).

267 Our results showed that diet and bacteria mostly impact larvae-to-pupae transition.  
268 Bacteria from rearing water promoted larval development upon nutrient scarcity but, above  
269 a given nutrient concentration, impaired larval viability while the opposite trend was shown  
270 in AM larvae. Upon high nutrient concentration, bacterial presence seemed toxic for  
271 mosquito larvae although at low diet concentration, it promoted larval development  
272 through an increased viability and a shorter development time. Together, it underlies the  
273 importance of bacteria and diet interaction on mosquito fitness in *Ae. albopictus*. Bacterial

274 growth in rearing water depends on the strain and diet considered although total bacterial  
275 load increases with diet concentration (43, 46). Maintenance of a bacterial homeostasis in  
276 mosquitoes is under tight immunological control (65). Therefore, we can hypothesize that  
277 diet concentration mediates an increase in water bacterial load that disrupt bacterial  
278 homeostasis, leading to a fitness decrease in mosquito.

279         Despite larval development time depended on diet x microbiota interaction, CONV  
280 development time remained around 6 to 7 days with only a small increase at the highest  
281 diet concentration tested. This suggests that within a range of diet concentration, bacteria  
282 from rearing water can buffer nutrient scarcity that maintains a short larval development  
283 time as in *Drosophila* (37). However, development time of CONV mosquito larvae was  
284 steadily ~5 days shorter than AM siblings even at the highest diet concentration,  
285 conversely to *Drosophila* for which this developmental delay is observed in nutrient-poor  
286 conditions but abolished on rich diet (11). Although the use of microorganisms as nutrients  
287 by mosquitoes is generally pointed out (66), our results suggest that, beyond a food  
288 source, bacteria are actively providing *Ae. albopictus* with compounds as supported by the  
289 identification of folate and riboflavin provisioning by bacteria as an essential mechanism  
290 for mosquito development in *Ae. aegypti* (41, 42). Further experiments comparing  
291 metabolically inactive (e.g. heat-killed) and active bacterial exposure in axenic larvae will  
292 provide additional evidences to understand host-microbe interactions in mosquito.

293         A previous study showed that diet concentration impacts microbiota composition in  
294 *Ae. aegypti* larvae and adults (46). Our results unravelled a more complex interaction  
295 involving both the diet concentration and the bacterial load inoculum in shaping bacterial  
296 communities in larval water. Results showed that nutrient-rich water samples colonized  
297 with a highly concentrated inoculum have a strongly similar bacterial community compared  
298 to nutrient poor samples exposed to a diluted bacterial inoculum. Several OTUs were  
299 preferentially retrieved in water following exposure to a highly diluted ( $10^{-8}$ ) inoculum

300 supporting the idea of a more random bacterial community construction upon low initial  
301 bacterial dose. Interestingly, the four OTUs that correlated to diet concentration were more  
302 abundant at the lowest diet concentration suggesting that nutrient density and/or  
303 competition could impact their load upon higher diet concentration. Notably, one OTU from  
304 the *Comamonadaceae* family with a higher abundance in rearing water upon low (1%) diet  
305 concentration displayed the same abundance/diet concentration pattern in *Ae. aegypti*  
306 (46). OTU from genus *Bosea* was more abundant when diet concentration was low (1%),  
307 and its abundance correlated with larvae viability although not in a linear way. Present in  
308 sylvatic *Ae. aegypti* larval habitats, *Bosea* can trigger a decrease in adult lifespan upon  
309 larval exposure (45). *Chryseobacterium* and *Sphingobacterium* abundance negatively  
310 correlated with larvae viability. If *Chryseobacterium* was often encountered in mosquito  
311 microbiota and restored larval development in mono-association (67), our results suggest  
312 that its abundance is key for *Ae. albopictus* performance. *Sphingobacterium* was  
313 associated with a developmental delay and shorter wing length in *Ae. aegypti* (43). Our  
314 data suggest that it can also impair larval viability in a density-dependent manner.  
315 Altogether, our data indicate a complex interplay between bacterial founders and nutrients  
316 load that shape bacterial community structure and impact mosquito performance. While it  
317 is known that given bacterial strains can compensate for mosquito larvae auxotrophies  
318 notably for vitamins (41, 42), data are still lacking to fully understand complex multipartite  
319 host-microbe interactions in mosquitoes. For instance, *Lactoplantibacillus plantarum* and  
320 *Acetobacter pomorum* triggered a metabolic cooperation that complemented *Drosophila*  
321 larval auxotrophies through metabolites that are not produced by bacteria in a mono-  
322 association context (68). This underlines that diet-microbiota interaction is key as diet  
323 selects for diet-adapted strains, influences the growth of microorganisms and cooperation  
324 in the niche which in turn impacts host performance as shown in fly and mammals (4, 5,  
325 69). The situation can be further complexified if we consider other microorganisms from

326 *Ae. albopictus* microbiota that can be directly involved in mosquito metabolism as recently  
327 uncovered for fungi (70) or indirect effects such as arbovirus-mediated modulation of  
328 bacterial diversity in adult mosquitoes (71).

329         The development of gnotobiology (76) and holidic diets coupled to in-depth  
330 transcriptomic and metabolic analysis will help toward the understanding of mosquito  
331 interaction with their biotic and abiotic environment (41). Interestingly, recent work showed  
332 opposite conclusions on the impact of microbiota on larval transcriptome, advocating for  
333 additional studies that compare transcriptomes of axenic and mono-associated larvae with  
334 field-derived bacterial isolates, upon diet and bacterial inoculum variations (39, 40). More  
335 broadly, it has potential major applications for alternative vector control strategies for  
336 instance by manipulating mosquito oviposition behaviour through bacteria and diet in the  
337 rearing water in order to limit mosquito density (75). Altogether, this work provides a better  
338 understanding of the ecological determinants of symbiosis in a medically relevant  
339 organism while opening interesting avenues for alternative vector control strategies. It also  
340 uncovers a fragile equilibrium between diet, bacteria and mosquito fitness, opening  
341 questions about the genetic and environmental basis of mosquito traits notably involved in  
342 vectorial capacity.

343

## 344 MATERIAL AND METHODS

345

346 **Mosquito colony maintenance.** F<sub>9</sub> and F<sub>10</sub> from an *Ae. albopictus* colony (referred  
347 as VB) established from field mosquitoes collected in 2018 in Villeurbanne and Pierre-  
348 Bénite (France) were used. Larvae were maintained at 26°C with dechlorinated water and  
349 Tetramin fish food. Adults were raised at 28°C, 80% relative humidity, 16:8 light:dark  
350 photoperiod in mass rearing. Females were blood fed on mice in accordance with the  
351 Institutional Animal Care and Use Committee from Lyon1 University (Apafis #31807-  
352 2021052715018315). Egg papers were stored at 28°C for up to two months.

353

354 **Diet plugs preparation.** Sterile agar diet plugs of various concentrations were  
355 prepared. Finely grinded tropical fish flakes (TetraMin) were mixed with sterile water at  
356 final concentrations of 20%, 12%, 10%, 8%, 5%, 2%, 1%, 0.5% and 0.1% (w:v).  
357 Bacteriological agar (Conda) was added at a final concentration of 1.6% (w:v). Diet  
358 suspensions were autoclaved (120°C, 20 min), poured into 90 mm petri dishes (20 mL per  
359 dish) and stored at 4°C for up to 3 days. Die-cut of 0.6 g agar food plugs using a 15-mL  
360 sterile tube (Falcon) allowed a precise control of food quantity.

361

362 **Preparation of conventional microbial inoculum.** Larvae hatched from surface-  
363 sterilized eggs were re-associated with a microbiota representative of the insectary-reared  
364 siblings to obtain conventional (CONV) larvae. Briefly, VB eggs hatched were in hatched  
365 for 2h at -20 ATM in a vacuum chamber then 200 first instar larvae were transferred in 24  
366 x 32 x 9 cm plastic trays with 1.5 L of dechlorinated water. After 7 days at 26°C with 0.1 g /  
367 tray every two days of grinded fish flakes (Tetramin) supplemented with yeast extract  
368 (Biover) (3:1 w:w), 50 mL of water (without larvae) from 3 independent trays were pooled  
369 to constitute the CONV inoculum. When testing for inoculum batch effect, 3 batches were



370 prepared from independent egg papers. To prepare CONV larvae first instars from  
371 surface-sterilized eggs were exposed immediately upon hatching to CONV inoculum at  
372 selected dilution (from  $10^{-3}$  to  $10^{-8}$ ) in sterile water (Gibco). Bacterial composition of CONV  
373 inoculum is provided (FIG S2) while no eukaryotic microorganisms were detected by 18S  
374 PCR.

375

376 **Conventional and altered microbiota mosquito production.** After hatching  
377 larvae acquire their microbiota through the ingestion of microorganisms present on the egg  
378 surface or in the rearing water. *Ae. albopictus* larvae with altered microbiota (AM) were  
379 obtained by surface sterilization of mosquito eggs (FIG S1). In 6-well plates, a 0.6 g agar  
380 food plug at the selected concentration was added per well with 5 mL of sterile water (for  
381 AM condition) or 5 ml of CONV inoculum at selected dilutions (for CONV condition). A total  
382 of 3 larvae / well was added and plates were incubated at 28°C in complete darkness for  
383 up to 22 days. The well is the biological replicate unit and 6 to 18 wells were tested for  
384 each condition. For each experiment, agar plugs and PBS (in which surface-sterilized  
385 larvae hatched) were incubated on LBm agar for 7 days at 30°C to control for the absence  
386 of cultivable contaminants. Wells were observed daily and discarded in presence of turbid  
387 water. As a majority of microorganisms are not cultivable, random wells were observed for  
388 each plate under the microscope to assess the absence of microbial contaminants.

389

390 **Larvae viability and development time.** Presence of pupae was recorded daily at  
391 fixed hours. Larvae-to-pupae viability represents the percentage of larvae that reached  
392 pupal stage. Development time represents the time (in days) needed to reach 50% of the  
393 total number of pupae ( $Day_{50}$ ). On the day of emergence, pupae were individually  
394 transferred with ~300  $\mu$ L of rearing water in a sterile tube for emergence. Adults were  
395 sexed before storage together with water of emergence at -80°C.

396

397       **Wing length measurement.** Wing length is a proxy for *Ae. albopictus* adult  
398 performance (79). Adults stored at -80°C were thawed and both wings were dissected  
399 under a Leica M80 stereomicroscope. Wings were included Eurapal (Roth) on a 10-wells,  
400 epoxy-coated glass slide (Labelians). Slides were photographed at 20x magnification with  
401 Leica MC170 HD camera. Images were analysed with ImageJ (version 2.1.0/1.53c). Wing  
402 length was measured between the intersection of the second and third vein and the  
403 intersection of the seventh vein with the wing border using ImageJ (80).

404

405       **DNA isolation from larvae rearing water.** Five days post exposure with CONV  
406 inoculum, 500 µL of rearing water were stored at -20°C prior to total DNA isolation.  
407 Samples were centrifuged for 20 min, 4°C, at 17,000 G and the pellet containing the  
408 microorganisms was used to extract DNA with the DNeasy Blood & Tissue kit as  
409 recommended (Qiagen). DNA concentration was estimated by Qubit dsDNA HS kit  
410 (Thermo Fisher scientific) and samples were stored at -20°C. A blank control was  
411 performed by using only DNA lysis buffer to control DNA microbial contaminations arising  
412 from kit reagents or the environment during DNA isolation.

413

414       **Quantitative PCR of 16S DNA.** The 16S DNA load was measured by qPCR using  
415 the Itaq SYBR green supermix kit (Bio-Rad), 784F (5'-AGGATTAGATACCCTGGTA-3')  
416 and 1061R (5'-CRRACGAGCTGAC') primers and 5 ng of template DNA isolated from  
417 water samples. The 16 µL reaction comprised 0.48 µL of each primer at 10 µM, 8 µL of  
418 Master mix and 5.04 µL of PCR grade water. After a single denaturation step at 95°C for 3  
419 min, a two-step amplification was performed including 10 s at 95°C followed by 30 s at  
420 60°C, for 40 cycles on a Bio-Rad CFX96 machine. The number of 16S copies per µL was

421 calculated using serial dilutions of an *Acinetobacter* PCR amplicon from  $10^8$  to  $10$   
422 copies/ $\mu$ L.

423

424 **Microbial amplicon sequencing.** Identification of bacteria and eukaryotes was  
425 based on PCR amplification of a ~280 bp fragment of the V5-V6 variable region from the  
426 16S rRNA gene (52) and a ~430 bp fragment of the 18S gene (81). Duplicate PCR for  
427 each sample were done using the 5X Hot BIOAmp (Biofidal, Vaulx-en-Velin, France –  
428 <http://www.biofidal.com>). Duplicates PCR products were pooled and 5  $\mu$ L were separated  
429 by electrophoresis on 1.5% agarose gel supplemented with 2.5  $\mu$ L of clear sight DNA stain  
430 for 17 min at 100V. All the 18S PCR were negative. For the 16S, all PCR were positive at  
431 expected size. A total of 188 libraries from 16S amplicons were constructed, including  
432 controls. Sequencing was done on Illumina MiSeq (2x300 bp, paired-end) at Biofidal. In  
433 total, 20,764,855 reads were obtained and demultiplexed. Sequence quality control and  
434 analysis were carried out using the FROGS pipeline (82) as described (83). Taxonomic  
435 affiliation was performed with SILVA database 138.1 for bacteria (84) with Mothur pipeline  
436 (85) at a 80% minimum bootstrap using a naïve Bayesian classifier (86). Sequences were  
437 grouped into operational taxonomic units (OTUs) by clustering at 97% similarity. No OTUs  
438 were detected in the blank extraction or PCR controls. To compare samples, normalization  
439 was performed at 11,780 sequences. A total of 184 operational taxonomic units (OTUs)  
440 was obtained. OTUs with a relative abundance less than 10 times greater than that  
441 observed in the negative control were removed (52). All FastQ files were deposited in the  
442 EMBL European Nucleotide Archive (<https://www.ebi.ac.uk/ena>) under the project  
443 accession number PRJEB57586. The small amount of residual bacterial DNA detected in  
444 water from altered microbiota larvae was quantified by qPCR, and taxonomic identity and  
445 relative abundance of the 5 OTUs detected shown (FIG S3).

446

447           **Statistical analysis.** Analyses and graphical representations were done on R  
448 (<http://www.r-project.org/>). Larvae- and pupae-to-adult viability (binary response variable)  
449 were analysed by generalized linear mixed-effects (GLMM) (87). GLMM with a binomial  
450 distribution and a probit link function were fitted by maximum likelihood (Laplace  
451 approximation). The development time (Day<sub>50</sub>) and wing length (in mm) were analysed  
452 using linear mixed-effects (LMM) models fit by restricted maximum likelihood while  
453 controlling for normal distribution of the residuals. Microbial status and diet concentration  
454 in interaction represented fixed effects while experiment or batch of inoculum were  
455 included as random effect. The GLMM and LMM models were conducted under *lme4*  
456 package version 1.1-25 (88). The inference of explanatory variable on variations of the  
457 response variables was tested with a Wald  $\chi^2$  test or an ANOVA for binomial and  
458 continuous data respectively. *Post-hoc* comparisons after GLMM/LMM were performed  
459 with *emmeans* package version 1.5.2-1 (89) to estimate pairwise differences between diet  
460 concentrations and microbial status using Tukey-HSD test with p-value correction for  
461 multiple comparisons. Adonis-ANOVA and Non-Metric Multidimensional Scaling ordination  
462 were performed with the *ade4* and *vegan* packages (90, 91). Non-linear Spearman  
463 correlations were performed with the *Hmisc* package (92). Other R packages were used  
464 for data organization and representation such as *plyr* version 1.8.6 (93) and *ggplot2*  
465 version 3.3.2 (94).

466

## 467 REFERENCES

468

- 469 1. Sommer F, Bäckhed F. 2013. The gut microbiota — masters of host development and physiology. *Nat*  
470 *Rev Microbiol* 11:227–238.
- 471 2. Engel P, Moran NA. 2013. The gut microbiota of insects - diversity in structure and function. *Fems*  
472 *Microbiol Rev* 37:699–735.
- 473 3. Bäckhed F, Ley RE, Sonnenburg JL, Peterson DA, Gordon JI. 2005. Host-Bacterial Mutualism in the  
474 Human Intestine. *Science* 307:1915–1920.
- 475 4. Muegge BD, Kuczynski J, Knights D, Clemente JC, González A, Fontana L, Henrissat B, Knight R,  
476 Gordon JI. 2011. Diet Drives Convergence in Gut Microbiome Functions Across Mammalian Phylogeny and  
477 Within Humans. *Science* 332:970–974.
- 478 5. Martino M, Joncour P, Leenay R, Gervais H, Shah M, Hughes S, Gillet B, Beisel C, Leulier F. 2018.  
479 Bacterial Adaptation to the Host's Diet Is a Key Evolutionary Force Shaping *Drosophila*-*Lactobacillus*  
480 Symbiosis. *Cell host & microbe* 24:109-119.e6.
- 481 6. Ma D, Storelli G, Mitchell M, Leulier F. 2015. Studying host-microbiota mutualism in *Drosophila*:  
482 Harnessing the power of gnotobiotic flies. *Biomed J* 38:285–293.
- 483 7. Leitão-Gonçalves R, Carvalho-Santos Z, Francisco AP, Fioreze GT, Anjos M, Baltazar C, Elias AP, Itskov  
484 PM, Piper MDW, Ribeiro C. 2017. Commensal bacteria and essential amino acids control food choice  
485 behavior and reproduction. *Plos Biol* 15:e2000862.
- 486 8. Douglas AE. 2019. Simple animal models for microbiome research. *Nat Rev Microbiol* 17:764–775.
- 487 9. Sneller VP, Dadd RH. 1977. Requirement for sugar in a chemically defined diet for larval *Aedes aegypti*  
488 (Diptera: Culicidae). *J Med Entomol* 14:387–92.
- 489 10. Steven B, Hyde J, LaReau JC, Brackney DE. 2021. The Axenic and Gnotobiotic Mosquito: Emerging  
490 Models for Microbiome Host Interactions. *Front Microbiol* 12:714222.
- 491 11. Storelli G, Defaye A, Erkosar B, Hols P, Royet J, Leulier F. 2011. *Lactobacillus plantarum* promotes  
492 *Drosophila* systemic growth by modulating hormonal signals through TOR-dependent nutrient sensing. *Cell*  
493 *Metab* 14:403–414.
- 494 12. Storelli G, Strigini M, Grenier T, Bozonnet L, Schwarzer M, Daniel C, Matos R, Leulier F. 2017.  
495 *Drosophila* Perpetuates Nutritional Mutualism by Promoting the Fitness of Its Intestinal Symbiont  
496 *Lactobacillus plantarum*. *Cell Metabolism* 27:362-377.e8.
- 497 13. Consuegra J, Grenier T, Baa-Puyoulet P, Rahioui I, Akherraz H, Gervais H, Parisot N, Silva P da,  
498 Charles H, Calevro F, Leulier F. 2020. *Drosophila*-associated bacteria differentially shape the nutritional  
499 requirements of their host during juvenile growth. *Plos Biol* 18:e3000681.
- 500 14. Riddiford LM. 2012. How does juvenile hormone control insect metamorphosis and reproduction? *Gen*  
501 *Comp Endocr* 179:477–484.
- 502 15. Telang A, Frame L, Brown MR. 2007. Larval feeding duration affects ecdysteroid levels and nutritional  
503 reserves regulating pupal commitment in the yellow fever mosquito *Aedes aegypti* (Diptera: Culicidae). *J Exp*  
504 *Biol* 210:854–864.
- 505 16. Chambers GM, Klowden MJ. 1990. Correlation of nutritional reserves with a critical weight for pupation in  
506 larval *Aedes aegypti* mosquitoes. *J Am Mosquito Contr* 6:394–9.

- 507 17. Coon KL, Brown MR, Strand MR. 2016. Gut bacteria differentially affect egg production in the  
508 anautogenous mosquito *Aedes aegypti* and facultatively autogenous mosquito *Aedes atropalpus* (Diptera:  
509 Culicidae). *Parasite Vector* 9:375.
- 510 18. Guégan M, Zouache K, Démichel C, Minard G, Van VT, Potier P, Mavingui P, Moro CV. 2018. The  
511 mosquito holobiont: fresh insight into mosquito-microbiota interactions. *Microbiome* 6:49.
- 512 19. Scolari F, Casiraghi M, Bonizzoni M. 2019. *Aedes* spp. and Their Microbiota: A Review. *Front Microbiol*  
513 10:2036.
- 514 20. Johnson PH, Russell RC. 2019. Effects of Attachment Substrate, Larval Diet, and Temperature on  
515 Development and Survival of Immature *Coquillettidia linealis* (Skuse) and *Coquillettidia xanthogaster*  
516 (Edwards). *J Vector Ecol* 44:138–148.
- 517 21. Aznar VR, Alem I, Majo MSD, Byttebier B, Solari HG, Fischer S. 2018. Effects of Scarcity and Excess of  
518 Larval Food on Life History Traits of *Aedes aegypti* (Diptera: Culicidae). *J Vector Ecol* 43:117–124.
- 519 22. Levi T, Ben-Dov E, Shahi P, Borovsky D, Zaritsky A. 2014. Growth and development of *Aedes aegypti*  
520 larvae at limiting food concentrations. *Acta Trop* 133:42–44.
- 521 23. Kivuyo HS, Mbazi PH, Kisika DS, Munga S, Rumisha SF, Urasa FM, Kweka EJ. 2014. Performance of  
522 Five Food Regimes on *Anopheles gambiae* Senso Stricto Larval Rearing to Adult Emergence in Insectary.  
523 *Plos One* 9:e110671.
- 524 24. Puggioli A, Carrieri M, Dindo ML, Medici A, Lees RS, Gilles JRL, Bellini R. 2016. Development of *Aedes*  
525 *albopictus* (Diptera: Culicidae) Larvae Under Different Laboratory Conditions. *J Med Entomol* 54:142–149.
- 526 25. Araújo M da-Silva, Gil LHS, e-Silva A de-Almeida. 2012. Larval food quantity affects development time,  
527 survival and adult biological traits that influence the vectorial capacity of *Anopheles darlingi* under laboratory  
528 conditions. *Malaria J* 11:261–261.
- 529 26. Dickson LB, Jiolle D, Minard G, Moltini-Conclois I, Volant S, Ghoulane A, Bouchier C, Ayala D, Paupy C,  
530 Moro CV, Lambrechts L. 2017. Carryover effects of larval exposure to different environmental bacteria drive  
531 adult trait variation in a mosquito vector. *Sci Adv* 3:e1700585.
- 532 27. Moller-Jacobs LL, Murdock CC, Thomas MB. 2014. Capacity of mosquitoes to transmit malaria depends  
533 on larval environment. *Parasite Vector* 7:593.
- 534 28. Takken W, Verhulst NO. 2013. Host Preferences of Blood-Feeding Mosquitoes. *Annu Rev Entomol*  
535 58:433–453.
- 536 29. Telang A, Qayum AA, Parker A, Sacchetta BR, Byrnes GR. 2011. Larval nutritional stress affects vector  
537 immune traits in adult yellow fever mosquito *Aedes aegypti* (*Stegomyia aegypti*). *Med Vet Entomol* 26:271–  
538 81.
- 539 30. Joy TK, Arik AJ, Corby-Harris V, Johnson AA, Riehle MA. 2010. The impact of larval and adult dietary  
540 restriction on lifespan, reproduction and growth in the mosquito *Aedes aegypti*. *Exp Gerontol* 45:685–690.
- 541 31. Yee DA, Yee SH. 2007. Nestedness patterns of container-dwelling mosquitoes: effects of larval habitat  
542 within variable terrestrial matrices. *Hydrobiologia* 592:373–385.
- 543 32. YEE DA, JULIANO SA. 2006. Consequences of detritus type in an aquatic microsystem: effects on water  
544 quality, micro-organisms and performance of the dominant consumer. *Freshwater Biol* 51:448–459.
- 545 33. Kaufman MG, Wanja E, Maknojia S, Bayoh MN, Vulule JM, Walker ED. 2006. Importance of Algal  
546 Biomass to Growth and Development of *Anopheles gambiae* Larvae. *J Med Entomol* 43:669–676.

- 547 34. Coon KL, Vogel KJ, Brown MR, Strand MR. 2014. Mosquitoes rely on their gut microbiota for  
548 development. *Molecular Ecology* 23:2727–2739.
- 549 35. Coon KL, Valzania L, Brown MR, Strand MR. 2020. Predaceous Toxorhynchites mosquitoes require a  
550 living gut microbiota to develop. *Proc Royal Soc B* 287:20192705.
- 551 36. Correa MA, Matusovsky B, Brackney DE, Steven B. 2018. Generation of axenic *Aedes aegypti*  
552 demonstrate live bacteria are not required for mosquito development. *Nat Commun* 9:4464.
- 553 37. Ma D, Bou-Sleiman M, Joncour P, Indelicato C-E, Frochoux M, Braman V, Litovchenko M, Storelli G,  
554 Deplancke B, Leulier F. 2019. Commensal Gut Bacteria Buffer the Impact of Host Genetic Variants on  
555 *Drosophila* Developmental Traits under Nutritional Stress. *Iscience* 19:436–447.
- 556 38. Lee H-Y, Lee S-H, Lee J-H, Lee W-J, Min K-J. 2019. The role of commensal microbes in the lifespan of  
557 *Drosophila melanogaster*. *Aging Albany Ny* 11:4611–4640.
- 558 39. Hyde J, Correa MA, Hughes GL, Steven B, Brackney DE. 2020. Limited influence of the microbiome on  
559 the transcriptional profile of female *Aedes aegypti* mosquitoes. *Sci Rep-uk* 10:10880.
- 560 40. Vogel KJ, Valzania L, Coon KL, Brown MR, Strand MR. 2017. Transcriptome Sequencing Reveals  
561 Large-Scale Changes in Axenic *Aedes aegypti* Larvae. *Plos Neglect Trop D* 11:e0005273.
- 562 41. Wang Y, Eum JH, Harrison RE, Valzania L, Yang X, Johnson JA, Huck DT, Brown MR, Strand MR.  
563 2021. Riboflavin instability is a key factor underlying the requirement of a gut microbiota for mosquito  
564 development. *Proc National Acad Sci* 118:e2101080118.
- 565 42. Romoli O, Schönbeck JC, Hapfelmeier S, Gendrin M. 2021. Production of germ-free mosquitoes via  
566 transient colonisation allows stage-specific investigation of host–microbiota interactions. *Nat Commun*  
567 12:942.
- 568 43. Martinson VG, Strand MR. 2021. Diet–Microbiota Interactions Alter Mosquito Development. *Front*  
569 *Microbiol* 12:650743.
- 570 44. Souza RS, Virginio F, Riback TIS, Suesdek L, Barufi JB, Genta FA. 2019. Microorganism-Based Larval  
571 Diets Affect Mosquito Development, Size and Nutritional Reserves in the Yellow Fever Mosquito *Aedes*  
572 *aegypti* (Diptera: Culicidae). *Front Physiol* 10:152.
- 573 45. Giraud É, Varet H, Legendre R, Sismeiro O, Aubry F, Dabo S, Dickson LB, Moro CV, Lambrechts L.  
574 2022. Mosquito-bacteria interactions during larval development trigger metabolic changes with carry-over  
575 effects on adult fitness. *Mol Ecol* 31:1444–1460.
- 576 46. MacLeod HJ, Dimopoulos G, Short SM. 2021. Larval Diet Abundance Influences Size and Composition  
577 of the Midgut Microbiota of *Aedes aegypti* Mosquitoes. *Front Microbiol* 12:645362.
- 578 47. Paupy C, Delatte H, Bagny L, Corbel V, Fontenille D. 2009. *Aedes albopictus*, an arbovirus vector: from  
579 the darkness to the light. *Microbes Infect* 11:1177–1185.
- 580 48. Fernandes RS, O'Connor O, Bersot MIL, Girault D, Dokunengo MR, Pocquet N, Dupont-Rouzeyrol M,  
581 Lourenço-de-Oliveira R. 2020. Vector Competence of *Aedes aegypti*, *Aedes albopictus* and *Culex*  
582 *quinquefasciatus* from Brazil and New Caledonia for Three Zika Virus Lineages. *Pathogens* 9:575.
- 583 49. Bonizzoni M, Gasperi G, Chen X, James AA. 2013. The invasive mosquito species *Aedes albopictus*:  
584 current knowledge and future perspectives. *Trends Parasitol* 29:460–468.
- 585 50. Kraemer MUG, Reiner RC, Brady OJ, Messina JP, Gilbert M, Pigott DM, Yi D, Johnson K, Earl L,  
586 Marczak LB, Shirude S, Weaver ND, Bisanzio D, Perkins TA, Lai S, Lu X, Jones P, Coelho GE, Carvalho  
587 RG, Bortel WV, Marsboom C, Hendrickx G, Schaffner F, Moore CG, Nax HH, Bengtsson L, Wetter E, Tatem  
588 AJ, Brownstein JS, Smith DL, Lambrechts L, Cauchemez S, Linard C, Faria NR, Pybus OG, Scott TW, Liu



- 589 Q, Yu H, Wint GRW, Hay SI, Golding N. 2019. Past and future spread of the arbovirus vectors *Aedes aegypti*  
590 and *Aedes albopictus*. *Nat Microbiol* 4:854–863.
- 591 51. Hawley WA. 1988. The biology of *Aedes albopictus*. *J Am Mosquito Control Assoc Suppl* 1:1–39.
- 592 52. Minard G, Tran FH, Van VT, Goubert C, Bellet C, Lambert G, Kim KLH, Thuy THT, Mavingui P, Moro  
593 CV. 2015. French invasive Asian tiger mosquito populations harbor reduced bacterial microbiota and genetic  
594 diversity compared to Vietnamese autochthonous relatives. *Front Microbiol* 6:970.
- 595 53. Trexler JD, Apperson CS, Zurek L, Gemeno C, Schal C, Kaufman M, Walker E, Watson DW, Wallace L.  
596 2003. Role of bacteria in mediating the oviposition responses of *Aedes albopictus* (Diptera: Culicidae). *J Med*  
597 *Entomol* 40:841–848.
- 598 54. Guégan M, Van VT, Martin E, Minard G, Tran F, Fel B, Hay A, Simon L, Barakat M, Potier P, Haichar F  
599 el Z, Moro CV. 2020. Who is eating fructose within the *Aedes albopictus* gut microbiota? *Environ Microbiol*  
600 22:1193–1206.
- 601 55. Wang X, Liu T, Wu Y, Zhong D, Zhou G, Su X, Xu J, Sotero CF, Sadruddin AA, Wu K, Chen X-G, Yan G.  
602 2018. Bacterial microbiota assemblage in *Aedes albopictus* mosquitoes and its impacts on larval  
603 development. *Mol Ecol* 27:2972–2985.
- 604 56. Yoshioka M, Couret J, Kim F, McMillan J, Burkot TR, Dotson EM, Kitron U, Vazquez-Prokopec GM.  
605 2012. Diet and density dependent competition affect larval performance and oviposition site selection in the  
606 mosquito species *Aedes albopictus* (Diptera: Culicidae). *Parasite Vector* 5:225.
- 607 57. Schwarzer M, Makki K, Storelli G, Machuca-Gayet I, Srutkova D, Hermanova P, Martino ME, Balmant S,  
608 Hudcovic T, Heddi A, Rieusset J, Kozakova H, Vidal H, Leulier F. 2016. *Lactobacillus plantarum* strain  
609 maintains growth of infant mice during chronic undernutrition. *Science* 351:854–857.
- 610 58. Shin SC, Kim S-H, You H, Kim B, Kim AC, Lee K-A, Yoon J-H, Ryu J-H, Lee W-J. 2011. *Drosophila*  
611 microbiome modulates host developmental and metabolic homeostasis via insulin signaling. *Science*  
612 334:670–674.
- 613 59. Allman MJ, Fraser JE, Ritchie SA, Joubert DA, Simmons CP, Flores HA. 2020. *Wolbachia*'s Deleterious  
614 Impact on *Aedes aegypti* Egg Development: The Potential Role of Nutritional Parasitism. *Insects* 11:735.
- 615 60. Gavotte L, Mercer DR, Stoeckle JJ, Dobson SL. 2010. Costs and benefits of *Wolbachia* infection in  
616 immature *Aedes albopictus* depend upon sex and competition level. *J Invertebr Pathol* 105:341–346.
- 617 61. Gavotte L, Mercer DR, Vandyke R, Mains JW, Dobson SL. 2009. *Wolbachia* Infection and Resource  
618 Competition Effects on Immature *Aedes albopictus* (Diptera: Culicidae). *J Med Entomol* 46:451–459.
- 619 62. Straub TJ, Shaw WR, Marcenac P, Sawadogo SP, Dabiré RK, Diabaté A, Catteruccia F, Neafsey DE.  
620 2020. The *Anopheles coluzzii* microbiome and its interaction with the intracellular parasite *Wolbachia*. *Sci*  
621 *Rep-uk* 10:13847.
- 622 63. Audsley MD, Seleznev A, Joubert DA, Woolfit M, O'Neill SL, McGraw EA. 2018. *Wolbachia* infection  
623 alters the relative abundance of resident bacteria in adult *Aedes aegypti* mosquitoes, but not larvae. *Mol Ecol*  
624 27:297–309.
- 625 64. Hughes GL, Dodson BL, Johnson RM, Murdock CC, Tsujimoto H, Suzuki Y, Patt AA, Cui L, Nossa CW,  
626 Barry RM, Sakamoto JM, Hornett EA, Rasgon JL. 2014. Native microbiome impedes vertical transmission of  
627 *Wolbachia* in *Anopheles* mosquitoes. *Proc National Acad Sci* 111:12498–12503.
- 628 65. Pang X, Xiao X, Liu Y, Zhang R, Liu J, Liu Q, Wang P, Cheng G. 2016. Mosquito C-type lectins maintain  
629 gut microbiome homeostasis. *Nat Microbiol* 1:16023.



- 630 66. Merritt RW, Dadd RH, Walker ED. 1992. Feeding behavior, natural food, and nutritional relationships of  
631 larval mosquitoes. *Annu Rev Entomol* 37:349–376.
- 632 67. Coon KL, Brown MR, Strand MR. 2016. Mosquitoes host communities of bacteria that are essential for  
633 development but vary greatly between local habitats. *Mol Ecol* 25:5806–5826.
- 634 68. Consuegra J, Grenier T, Akherraz H, Rahioui I, Gervais H, Silva P da, Leulier F. 2020. Metabolic  
635 Cooperation among Commensal Bacteria Supports *Drosophila* Juvenile Growth under Nutritional Stress.  
636 *Iscience* 23:101232.
- 637 69. Sonnenburg JL, Bäckhed F. 2016. Diet–microbiota interactions as moderators of human metabolism.  
638 *Nature* 535:56–64.
- 639 70. Guégan M, Martin E, Van VT, Fel B, Hay A-E, Simon L, Butin N, Bellvert F, Haichar F el Z, Moro CV.  
640 2022. Mosquito sex and mycobiota contribute to fructose metabolism in the Asian tiger mosquito *Aedes*  
641 *albopictus*. *Microbiome* 10:138.
- 642 71. Zouache K, Michelland RJ, Failloux A-B, Grundmann GL, Mavingui P. 2012. Chikungunya virus impacts  
643 the diversity of symbiotic bacteria in mosquito vector. *Mol Ecol* 21:2297–2309.
- 644 72. Ramirez JL, Short SM, Bahia AC, Saraiva RG, Dong Y, Kang S, Tripathi A, Mlambo G, Dimopoulos G.  
645 2014. *Chromobacterium Csp\_P* reduces malaria and dengue infection in vector mosquitoes and has  
646 entomopathogenic and in vitro anti-pathogen activities. *Plos Pathog* 10:e1004398.
- 647 73. Apte-Deshpande AD, Paingankar MS, Gokhale MD, Deobagkar DN. 2014. *Serratia odorifera* mediated  
648 enhancement in susceptibility of *Aedes aegypti* for chikungunya virus. *Indian J Medical Res* 139:762–8.
- 649 74. Wu P, Sun P, Nie K, Zhu Y, Shi M, Xiao C, Liu H, Liu Q, Zhao T, Chen X, Zhou H, Wang P, Cheng G.  
650 2019. A Gut Commensal Bacterium Promotes Mosquito Permissiveness to Arboviruses. *Cell Host Microbe*  
651 25:101-112.e5.
- 652 75. Girard M, Martin E, Vallon L, Raquin V, Bellet C, Rozier Y, Desouhant E, Hay A-E, Luis P, Moro CV,  
653 Minard G. 2021. Microorganisms Associated with Mosquito Oviposition Sites: Implications for Habitat  
654 Selection and Insect Life Histories. *Microorg* 9:1589.
- 655 76. Romoli O, Gendrin M. 2020. Springer Protocols Handbooks 179–189.
- 656 77. Barredo E, DeGennaro M. 2020. Not Just from Blood: Mosquito Nutrient Acquisition from Nectar  
657 Sources. *Trends Parasitol* 36:473–484.
- 658 78. Matthews BJ, Younger MA, Voshall LB. 2018. The ion channel ppk301 controls freshwater egg-laying in  
659 the mosquito *Aedes aegypti*. bioRxiv <https://doi.org/10.1101/441592>.
- 660 79. Armbruster P, Hutchinson RA. 2002. Pupal Mass and Wing Length as Indicators of Fecundity in *Aedes*  
661 *albopictus* and *Aedes geniculatus* (Diptera: Culicidae). *J Med Entomol* 39:699–704.
- 662 80. Minard G, Tran F-H, Van VT, Fournier C, Potier P, Roiz D, Mavingui P, Moro CV. 2018. Shared larval  
663 rearing environment, sex, female size and genetic diversity shape *Ae. albopictus* bacterial microbiota. *Plos*  
664 *One* 13:e0194521.
- 665 81. Thongsripong P, Chandler JA, Green AB, Kittayapong P, Wilcox BA, Kapan DD, Bennett SN. 2017.  
666 Mosquito vector-associated microbiota: Metabarcoding bacteria and eukaryotic symbionts across habitat  
667 types in Thailand endemic for dengue and other arthropod-borne diseases. *Ecol Evol* 8:1352–1368.
- 668 82. Escudié F, Auer L, Bernard M, Mariadassou M, Cauquil L, Vidal K, Maman S, Hernandez-Raquet G,  
669 Combes S, Pascal G. 2017. FROGS: Find, Rapidly, OTUs with Galaxy Solution. *Bioinform Oxf Engl*  
670 34:1287–1294.

- 671 83. Guégan M, Minard G, Tran F-H, Van VT, Dubost A, Moro CV. 2018. Short-term impacts of anthropogenic  
672 stressors on *Aedes albopictus* mosquito vector microbiota. *Fems Microbiol Ecol* 94.
- 673 84. Yilmaz P, Parfrey LW, Yarza P, Gerken J, Pruesse E, Quast C, Schweer T, Peplies J, Ludwig W,  
674 Glöckner FO. 2014. The SILVA and “All-species Living Tree Project (LTP)” taxonomic frameworks. *Nucleic  
675 Acids Res* 42:D643–D648.
- 676 85. Schloss PD, Westcott SL, Ryabin T, Hall JR, Hartmann M, Hollister EB, Lesniewski RA, Oakley BB,  
677 Parks DH, Robinson CJ, Sahl JW, Stres B, Thallinger GG, Horn DJV, Weber CF. 2009. Introducing mothur:  
678 Open-Source, Platform-Independent, Community-Supported Software for Describing and Comparing  
679 Microbial Communities. *Appl Environ Microb* 75:7537–7541.
- 680 86. Wang Q, Garrity GM, Tiedje JM, Cole JR. 2007. Naive Bayesian classifier for rapid assignment of rRNA  
681 sequences into the new bacterial taxonomy. *Appl Environ Microb* 73:5261–7.
- 682 87. Bolker BM, Brooks ME, Clark CJ, Geange SW, Poulsen JR, Stevens MHH, White J-SS. 2009.  
683 Generalized linear mixed models: a practical guide for ecology and evolution. *Trends Ecol Evol* 24:127–135.
- 684 88. Bates D, Mächler M, Bolker B, Walker S. 2015. Fitting Linear Mixed-Effects Models Using lme4. *J Stat  
685 Softw* 67:1–48.
- 686 89. R L. 2022. emmeans: Estimated Marginal Means, aka Least-Squares Means (R package version 1.8.1-  
687 1). <https://CRAN.R-project.org/package=emmeans>.
- 688 90. Dray S, Pélissier R, Couteron P, Fortin M-J, Legendre P, Peres-Neto PR, Bellier E, Bivand R, Blanchet  
689 FG, Cáceres MD, Dufour A-B, Heegaard E, Jombart T, Munoz F, Oksanen J, Thioulouse J, Wagner HH.  
690 2012. Community ecology in the age of multivariate multiscale spatial analysis. *Ecol Monogr* 82:257–275.
- 691 91. Oksanen, J. *et al.* 2022. vegan: Community Ecology Package (R package version 2.6-4).  
692 <https://CRAN.R-project.org/package=vegan>.
- 693 92. F HJ. 2022. Hmisc: Harrell Miscellaneous (R package version 4.7-1). [https://CRAN.R-  
694 project.org/package=Hmisc](https://CRAN.R-project.org/package=Hmisc).
- 695 93. Wickham H. 2011. The Split-Apply-Combine Strategy for Data Analysis. *J Stat Softw* 40:1–29.
- 696 94. Wickham H. *ggplot2: Elegant Graphics for Data Analysis*. Springer Science & Business Media.

697

698

## 699 **ACKNOWLEDGMENTS**

700

701 This project was funded by IDEX Lyon scientific breakthrough project, Micro-Be-Have. We  
702 acknowledge the contribution of the DTAMB and ACSED platforms of the Research  
703 Federation BioEEnviS (Biodiversité, Eau, Environnement, Ville et Santé) supported by  
704 University Lyon1 and CNRS. We thank all the members from the Micro-Be-Have  
705 consortium and the G-RREMI (Groupe Régional de Recherche En Microbiologie des  
706 Interactions Auvergne-Rhône-Alpes) for insightful comments and discussions.

707 **Legend of figures**

708

709

710 **FIG 1** Juvenile development pattern of *Ae. albopictus* larvae upon a diet gradient in  
711 presence or absence of bacteria. Development pattern of CONV (black) and AM (blue)  
712 larvae at four diet concentrations (2, 5, 10 and 12%). Three independent experiments (#1  
713 to #3 as indicated by color code) were performed, with one to three 6-well plates per  
714 experiment (3 larvae per well) for each microbial status and diet concentration  
715 combination. (A) Larval viability expressed as the proportion (in %) of mosquito larvae that  
716 reached pupal stage. Each dot represents the mean viability per 6-well plate. (B) Pupal  
717 viability expressed as the proportion (in %) of mosquito pupae that reached adult stage.  
718 Each dot represents the mean viability per 6-well plate. (C) Larval development time into  
719 pupae is represented as the time (in days) needed to reach 50% of the final number of  
720 pupae ( $Day_{50}$ ). Different letters indicate statistically significant viability following Tukey-  
721 HSD *post-hoc* pairwise comparison.

722

723 **FIG 2** Adult sex ratio and wing size upon a diet gradient in presence or absence of  
724 bacteria. Adults derived from CONV or AM larvae reared at different diet concentrations (2,  
725 5, 10 and 12%) were sorted by sex and individual wings length was measured. Three  
726 independent experiments (#1 to #3) were performed, with one to three 6-well plates per  
727 experiment (3 larvae per well) for each microbial status and diet concentration  
728 combination. The number of adults available varied according to the juvenile mortality rate  
729 of each combination. (A) Proportion of female and male adult mosquitoes. The number of  
730 individuals (n) for each condition is indicated. (B) Adult wings length (in mm). Each dot  
731 represents the mean length of both wings for an individual. From 5 to 17 individuals were  
732 analysed depending on the sex, microbial status and diet concentration. Different letters  
733 indicate statistically significant viability following Tukey-HSD *post-hoc* pairwise  
734 comparison.

735

736 **FIG 3** Juvenile performance of *Ae. albopictus* upon concomitant variation of bacterial  
737 inoculum and diet concentration. CONV larvae exposed to three microbial inoculum  
738 concentrations ( $10^{-4}$ ,  $10^{-6}$  and  $10^{-8}$ ) issued from three independent batches (B1, B2 and  
739 B3, color coded) and three inocula and diet (1, 5, and 12%) concentrations were  
740 monitored up to pupal stage. (A) Larval viability expressed as the proportion (in %) of  
741 larvae that reached pupal stage at different inoculum and diet concentrations. Each dot  
742 represents the mean viability per 6-well plate. (B) Larval development time expressed as

743 the time (in days) needed to reach 50% of the final number of pupae. Each dot represents  
744 the mean Day<sub>50</sub> per well. Different letters indicate statistically significant viability following  
745 Tukey-HSD *post-hoc* pairwise comparison. For each batch of inoculum, one 6-well plate  
746 was prepared (3 larvae per well) for each inoculum and diet concentration combination.

747

748 **FIG 4** Bacterial community structuration in larval rearing water upon bacterial inoculum  
749 and diet concentration gradients. (A) Relative abundances (in %) of bacterial operational  
750 taxonomic units (OTUs) at the genus level for each combination of inoculum and diet  
751 concentration, for the three batches of microbial inoculum (B1, B2, B3) used. OTUs  
752 representing less than 5% in relative abundance were grouped (red, <5% Rel. ab.). (B,C)  
753 Non-metric multidimensional scaling (NMDS) analysis of the Bray-Curtis dissimilarities as  
754 a function of diet concentration and inoculum dilution (B) or the interaction between batch  
755 of inoculum and inoculum dilution (C). (D) Heatmap representing Spearman correlation  
756 coefficient between phenotype of interest (development time (Day<sub>50</sub>), inoculum dilution,  
757 diet concentration or Larvae-to-pupae viability (L to P)) as a function of OUT abundance.  
758 Only OTUs with significative p-value (<1e<sup>-6</sup>) for correlation analysis and a correlation  
759 coefficient < -0.4 or > 0.4 are shown. When genus level information was not available, the  
760 family (F) or order (O) level is indicated.

761

762 **FIG S1** Protocol for surface sterilization of *Ae. albopictus* eggs. Protocol was adapted from  
763 previous work (36) *Ae. albopictus* eggs (<2 months old) were used. Careful visual  
764 inspection of egg papers under binocular was conducted prior to each experiment to avoid  
765 concave eggs (as a proxy for unfertilized eggs) or egg papers with mold or mites. Within  
766 each experiment, at least three different batches of embryos from the same generation but  
767 laid at different days were used. Under safety cabinet, eggs were rinsed twice by dipping  
768 the paper in sterile water to discard debris. Egg papers were then soaked in a petri dish  
769 containing 70% ethanol solution (in sterile water) for 5 min then transferred in a 50-mL  
770 falcon tube containing 30 mL of sodium hypochlorite (3% active chlorite) supplemented  
771 with 4 mg/mL ampicillin for 5 min. Sodium hypochlorite immediately detached the eggs  
772 from the paper, that was removed using clean forceps. Within the 5 min, eggs quickly  
773 settled at the bottom of the tube allowing the complete removal of sodium hypochlorite  
774 without the need of centrifugation. Eggs were resuspended in 25 ml of 70% ethanol and  
775 incubated for 5 min. We ensured that all eggs remained immersed in ethanol and gently  
776 agitated the tube to allow a complete contact of the eggs with ethanol solution. Eggs were  
777 rinsed three times in sterile water (Gibco) for 5 min then 30 mL of sterile 1X PBS was

778 added. The tube was closed with a 0.2  $\mu\text{m}$  filtered cap and transferred in a vacuum  
779 chamber outside the cabinet for 40 min at -20 ATM to allow hatching. The sterile first instar  
780 larvae were transferred under the safety cabinet in a sterile petri dish and immediately  
781 transferred in 6-well plates using a P1000 pipette according to the experimental design.

782

783 **FIG S2 Taxonomic identity and** relative abundance of bacterial OTUs in water inoculum  
784 for CONV larvae. Relative abundance (in %) of operational taxonomic units (OUT) of  
785 bacteria at genus level (or family (F) level) in water of conventionally reared larvae that  
786 served as inoculum for CONV condition. Two DNA samples (S1, S2) per batch of inoculum  
787 (Batch 1, 2 and 3) were sequenced except for Batch 3 (only one sample). The two OTUs  
788 that were isolated by culture-dependent approach on LBm media are shown (\*). OTUs  
789 representing less than 5% in relative abundance were grouped (red, <5% Rel. ab.).

790

791 **FIG S3** Bacteria composition and relative abundance of altered microbiota larvae rearing  
792 water DNA samples. (A) Quantification of 16S copies number ( $\log_{10}$ ) in DNA isolated from  
793 water of conventional (CONV) and altered microbiota water samples after five days at  
794 28°C. CONV samples (Cq values from 14 to 16, mean  $5.5 \times 10^6$  copies) originated from  
795 water containing larvae exposed to  $10^{-8}$  dilution of inoculum and incubated with 5% diet  
796 concentration. The altered microbiota DNA samples (Cq values from 28 to 29.4, mean  
797  $6.39 \times 10^2$  copies) originated from water with diet but no larvae (S1, S2), water with larvae  
798 and diet (S4, S5) or water without larvae nor diet (S3). A blank DNA isolation control (Cq  
799 34.9, 10.5 copies) was done by replacing water with DNA template by lysis buffer (S6). (B)  
800 Relative abundance of bacterial operational taxonomic units (OUT) at genus level in AM  
801 DNA water samples (S1 to S5). OUT representing less than 5% in relative abundance  
802 were grouped (red, <1% Rel. ab.). No reads were obtained from the blank DNA control.  
803 Presence/absence of larvae and diet is indicated for the five samples.

804

805 **FIG S4** *Ae. albopictus* larval viability depends on microbial exposure and diet  
806 concentration. Larval viability expressed as the proportion (in %) of conventional (CONV)  
807 exposed to a low dilution ( $10^{-3}$ ) of microbial inoculum (A) or altered microbiota (AM) (B)  
808 larvae that reached pupal stage upon different diet concentrations (in %). Each dot  
809 represents the mean viability of 3 wells from two independent 6-well plates (3 larvae/well).

810

811 **FIG S5** Correlation patterns between relative abundance of selected OTUs and larval traits  
812 or experimental factors. Only the most abundant OTUs for which a significant correlation  
813 (Spearman,  $P < 0.05$ ) with a correlation coefficient below -0.4 or above 0.4 was found are  
814 displayed.

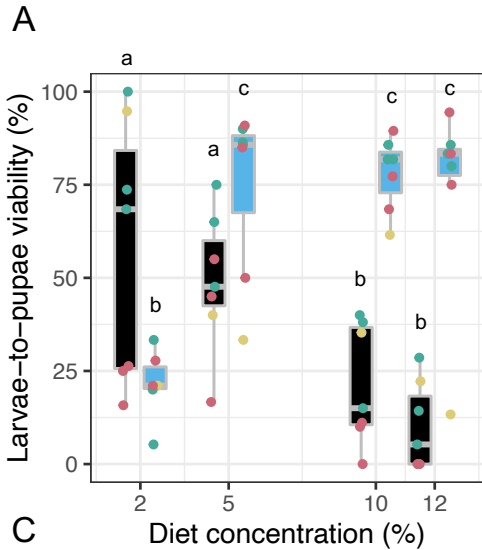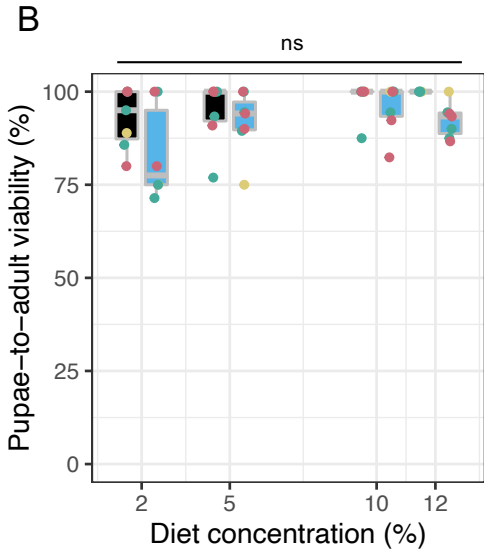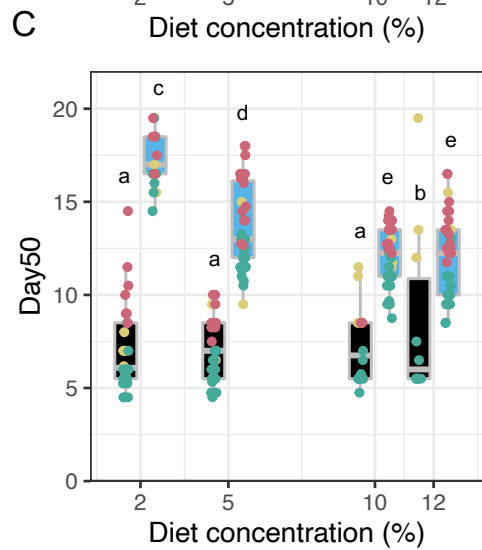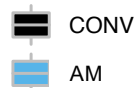

Experiment

- #1
- #2
- #3

**A**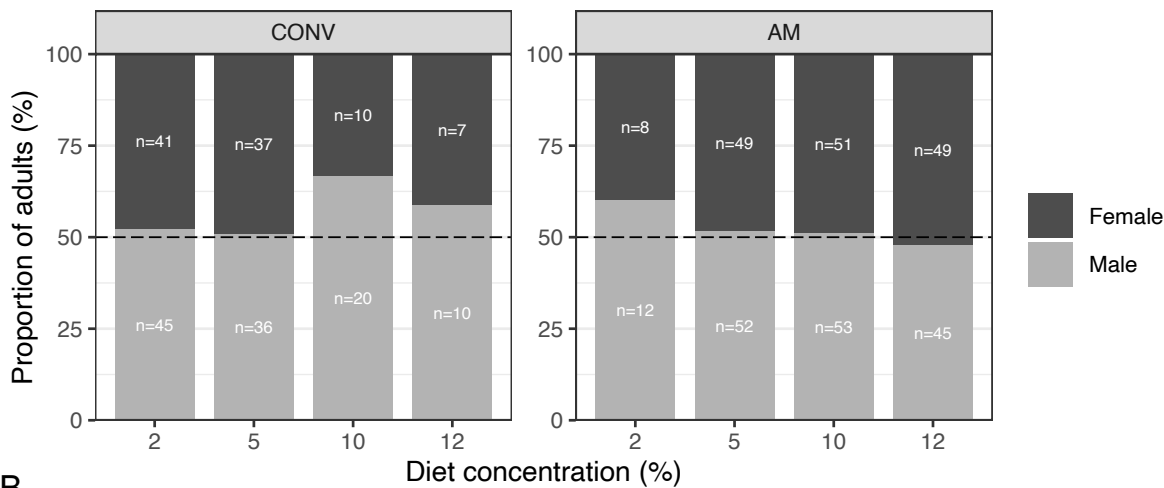**B**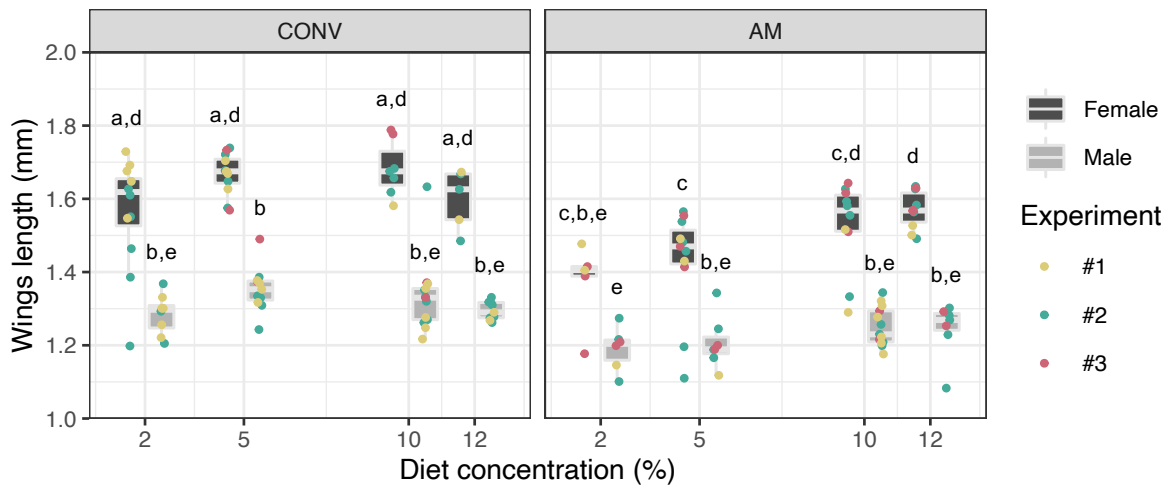



**A**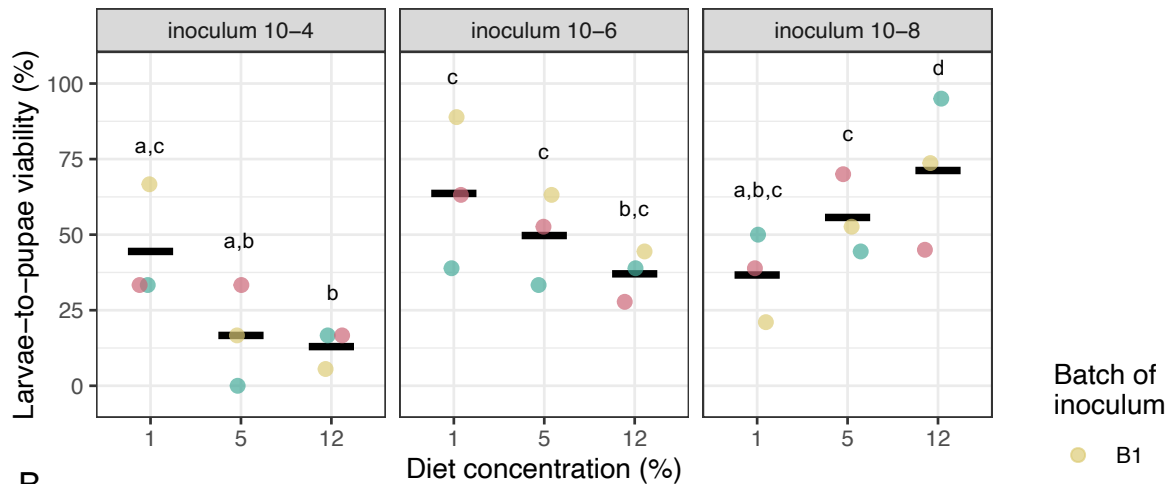**B**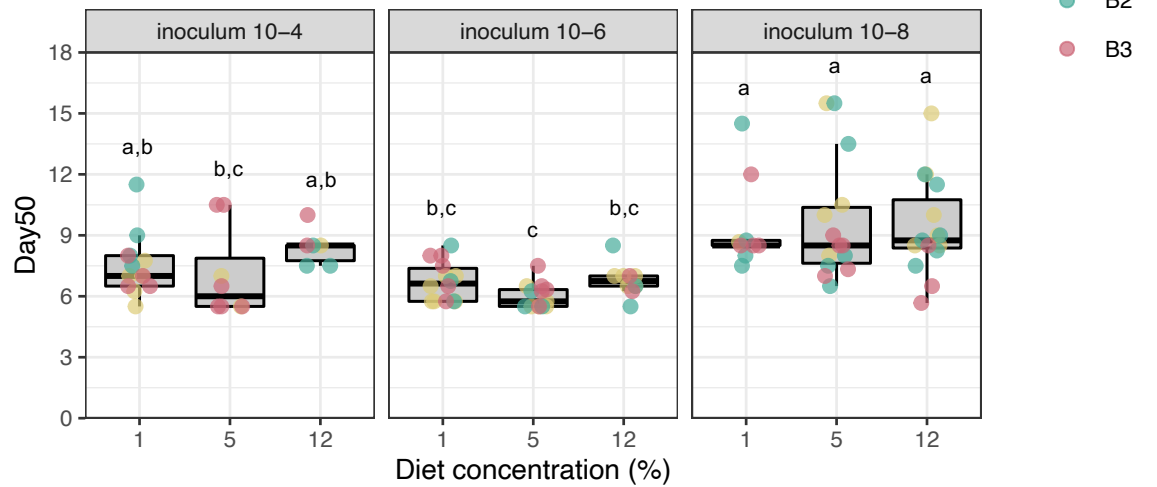

A

bioRxiv preprint doi: <https://doi.org/10.1101/2022.11.16.516852>; this version posted November 17, 2022. The copyright holder for this preprint (which was not certified by peer review) is the author/funder. All rights reserved. No reuse allowed without permission.

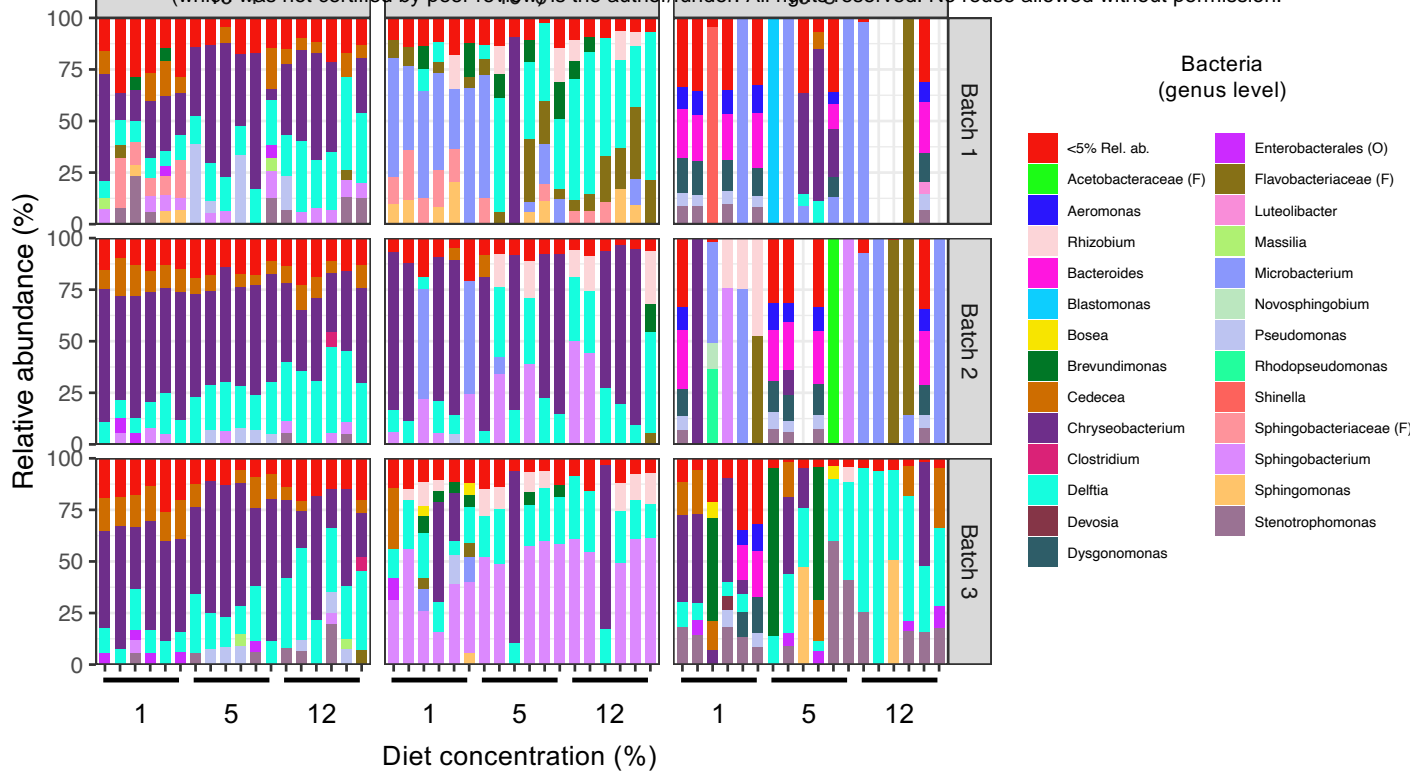

B

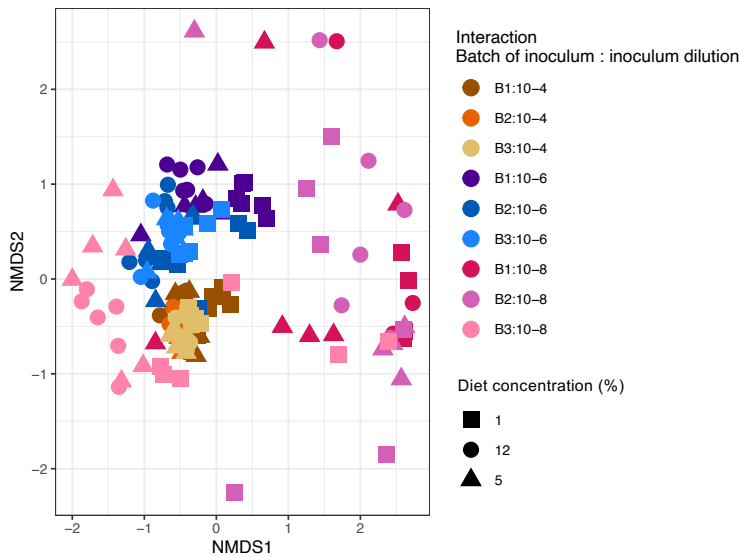

C

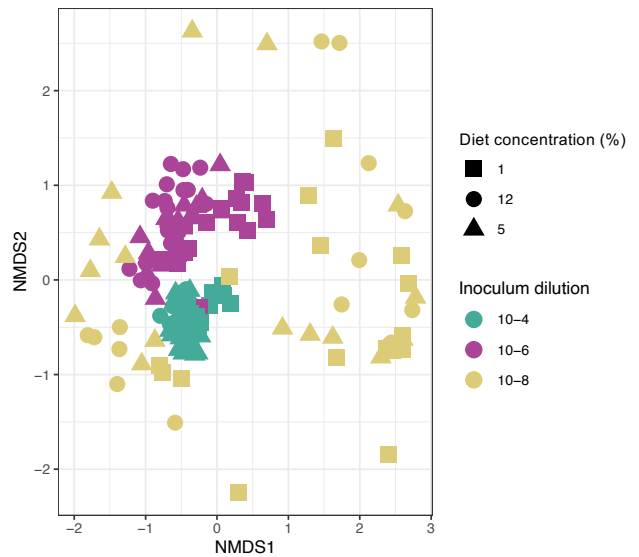

D

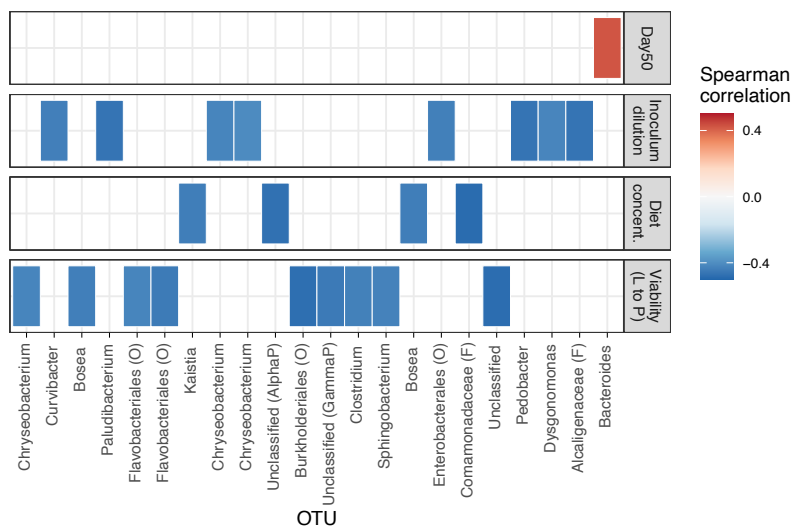

Source: https://www.biorxiv.org/content/10.1101/2022.11.16.516852v1.full.pdf
